# Supplementary material for: Mendelian randomization analysis of plasma levels of CD209 and MICB proteins and the risk of varicose veins of lower extremities
Source: PLoS One. 2022 May 20;17(5):e0268725. doi: 10.1371/journal.pone.0268725 (PMC9122226; doi:10.1371/journal.pone.0268725)
Supplement: S3 Table — (XLSX) [file pone.0268725.s003.xlsx]

## Sheet: list_of_suggestive_IVs
S3 Table. Summary statistics for instrumental variables suggestively associated with CD209 level.
					CD209 plasma level (EXPOSURE)							Varicose veins of lower extremities (OUTCOME)
					Sun et al., 2018b							Gene ATLASc
SNP	CHROMOSOME	POSITIONa	Effective allele	Alternative allele	EAF	BETA	SE	P-value	R2d	Fe	Sample size	EAF	BETAlinear	SElinear	BETAf	SEf	P-value	Sample size
rs12705056	7	98831356	C	T	0.8101	0.172	0.0336	3.07082e-07	0.0079384	26.2047	3301	0.1899	-0.00015218	0.00043594	-0.00581786	0.0166661	0.72703	452264
rs151212242g	19	7782146	C	T	0.2326	-0.4047	0.0299	9.70278e-42	0.0554982	183.199	3301	-	-	-	-	-	-	-
rs4804224g	19	7781016	C	T	0.2326	-0.4031	0.0299	2.00692e-41	0.0550602	181.754	3301	0.2326	-0.0010407	0.00040293	-0.0399618	0.0154721	0.0097972	452264
rs3124759	9	136342415	A	G	0.825	0.1837	0.0328	2.13599e-08	0.00950222	31.3668	3301	0.175	0.00029134	0.00043523	0.011516	0.0172036	0.50325	452264
rs514659h	9	136142203	A	C	0.6292	-0.8319	0.0224	6.74917e-302	0.417831	1379.26	3301	0.3708	-0.0016481	0.00035107	-0.0635316	0.0135332	2.6737e-06	452264
rs7248772	19	7807171	A	G	0.3101	-0.1366	0.0271	4.64098e-07	0.00769693	25.4076	3301	0.3101	0.00033479	0.00035491	0.0133314	0.0141325	0.34552	452264
a according to GRCh37.p13 assembly
b doi:10.1038/s41586-018-0175-2; this dataset was used as an "exposure" GWAS in the present study
c UK Biobank data available in the Gene ATLAS database (second release); http://geneatlas.roslin.ed.ac.uk/
d proportion of trait variance explained by SNP; approximated from Χ2df=1/N, where BETA2/SE2 ~ Χ2df=1 and N is a sample size
e F-statistic for particular SNP, approximated from Χ2df=1, where BETA2/SE2 ~ Χ2df=1
f logistic regression estimates obtained from linear regression estimates (see Methods)
g rs4804224 was used as a proxy for rs151212242 in the MR analysis for the Gene Atlas cohort (r2 = 1.0, D' = 1.0, allele C of rs151212242 is correlated with C allele of rs4804224, allele T of rs151212242 is correlated with allele T of rs4804224)
Both rs4804224 and rs151212242 are in LD (r2 = 0.87, D' = 0.99) with rs8106657 used as an instumental variable in the main analysis (see S1 Table).
h This SNPs is in LD (r2 = 0.99, D' = 1.0) with rs505922 used as an instumental variable in the main analysis (see S1 Table).
Abbreviations:
EAF, effect allele freqency
GWAS, genome-wide association study
SE, standard error
