# Supplementary material for: Mendelian randomization analysis of plasma levels of CD209 and MICB proteins and the risk of varicose veins of lower extremities
Source: PLoS One. 2022 May 20;17(5):e0268725. doi: 10.1371/journal.pone.0268725 (PMC9122226; doi:10.1371/journal.pone.0268725)
Supplement: S5 Table — (XLSX) [file pone.0268725.s005.xlsx]

## Sheet: S4 Table
S5 Table. Results of the IVW Mendelian randomization analysis of the effect of CD209 plasma levels on VVs considering each selected instrumental variable separately
					Gene ATLASa														eMERGE												FinnGen												Meta-analysis: eMERGE + FinnGen						Meta-analysis: Gene ATLASa + eMERGE + FinnGen
								Association between IV and VVs					MR analysis									Association between IV and VVs			MR analysis									Association between IV and VVs			MR analysis						MR analysis						MR analysis
IV	CHROMOSOME	POSITIONb	EFFECTIVE_ALLELE	ALTERNATIVE_ALLELE	EAF	VVs prevalence	N	BETAlinear	SElinear	BETAc	SEc	P	BETA_MR	SE_MR	P_MR	OR	95% CI lower	95% CI upper	EAF	VVs prevalence	N	BETA	SE	P	BETA_MR	SE_MR	P_MR	OR	95% CI lower	95% CI upper	EAF	VVs prevalence	N	BETA	SE	P	BETA_MR	SE_MR	P_MR	OR	95% CI lower	95% CI upper	BETA_MR	SE_MR	P_MR	OR	95% CI lower	95% CI upper	BETA_MR
rs505922h	9	136149229	C	T	0.3678	0.0265796	452264	0.0016563	0.00035218	0.0637537	0.013556	2.5644e-06	0.0767101	0.0163109	2.56375e-06	1.07973	1.04576	1.1148	0.3363	0.119763	48429	0.057193	0.0224577	0.0108747	0.0688161	0.0270217	0.0108747	1.07124	1.01598	1.1295	0.4338	0.0829645	128698	0.0668	0.0163	3.986e-05	0.0805985	0.019667	4.16448e-05	1.08394	1.04295	1.12653	0.0765183	0.0159012	1.49353e-06	1.07952	1.0464	1.1137	0.0766118
rs8106657	19	7788091	C	T	0.2565	0.0265796	452264	-0.00086783	0.00038346	-0.0338762	0.0149686	0.023626	0.0953722	0.0421412	0.023626	1.10007	1.01286	1.19479	0.2493	0.119763	48429	0.00467859	0.0246	0.849163	-0.0131717	0.0692568	0.849163	0.986915	0.861642	1.1304	0.2553	0.0829645	128698	-0.0058	0.0186	0.7536	0.0163288	0.0523649	0.755171	1.01646	0.917313	1.12633	0.00559833	0.0417693	0.893379	1.00561	0.926566	1.09141	0.0500874
P-value for comparison of MR beta values and their SEs between IVs (two-sample t-test)													0.679613												0.270092												0.250565						0.112558						0.403869
Sources of data for the outcome trait (VVs) are indicated in the first (highest) raw of the Table.
a UK Biobank data available in the Gene ATLAS database (second release); http://geneatlas.roslin.ed.ac.uk/
b according to GRCh37.p13 assembly
c logistic regression estimates obtained from linear regression estimates (see Methods)
d P-value for heterogeneity was assessed using Cochran's Q test
e P-value for comparison of MR beta values and their SEs between the Gene ATLAS and eMERGE datasets using a two-sample t-test
f P-value for comparison of MR beta values and their SEs between FinnGen and eMERGE datasets using a two-sample t-test
g P-value for comparison of MR beta values and their SEs between the Gene ATLAS and FinnGen datasets using a two-sample t-test
h rs576123 was used as a proxy for rs505922 in the MR analysis for the FinnGen cohort (r2 = 0.9746, D' = 0.9914, allele C of rs505922 is correlated with C allele of rs576123, allele T of rs505922 is correlated with allele T of rs576123); absent in Suhre at al. data
Abbreviations:
EAF, effect allele freqency
IV, instrumental variable
IVW, inverse-variance weighted meta-analysis of Wald ratios
MR, Mendelian randomization
P, P-value
SE, standard error
VVs, varicose veins of lower extremities
OR, odds ratio
CI, confidence interval
The statistical significance threshold for the Q test and t-tests was set at P-value < 0.05
[truncated: 10 more columns]
